# Supplementary material for: Reversible aminolysis: a new concept for postpolymerization modification
Source: Royal Society of Chemistry journal article supplement (doi:10.1039/d4py00827h), 2024-01-01
Supplement: d4py00827h1.pdf [file d4py00827h1.pdf]

# Reversible Aminolysis: A New Concept for Postpolymerization Modification

*Koki Kasai<sup>a</sup>, Hideki Amii<sup>a</sup>, and Ryohei Kakuchi<sup>\*a</sup>*

<sup>a</sup> Division of Molecular Science, Faculty of Science and Technology, Gunma University, 1-5-1 Tenjin,  
Kiryu, Gunma 376-8515, Japan

## SUPPORTING INFORMATION

## ***Experimental Section***

### **Materials**

An aqueous 12N HCl solution and ethanol (99.5%) was purchased from Kanto Chemical Co., Ltd. and used as received. Poly(ethyl 2,2-difluoro-2-(4-vinylphenoxy)acetate) (PSt-OCF<sub>2</sub>CO<sub>2</sub>Et) and poly(*n*-hexyl 2,2-difluoro-2-(4-vinylphenoxy)acetamide) (PSt-OCF<sub>2</sub>CONH-hex) were prepared according to published protocol.<sup>1</sup> All other chemicals were commercially available and used without further purification unless otherwise stated.

### **Instruments**

All the <sup>1</sup>H and <sup>19</sup>F NMR spectra in deuterated solvents were recorded on Bruker 500 MHz FT-NMR spectrometer, and the chemical shifts ( $\delta$ ) are given in ppm with either the solvent peak or tetramethylsilane as the internal standard. The <sup>19</sup>F NMR spectra were calibrated with an internal standard (C<sub>6</sub>F<sub>6</sub> = 0 ppm). The SEC measurements were performed at 40 °C and a flow rate of 0.35 mL·min<sup>-1</sup> in dimethylformamide (DMF) containing 10 mmol·L<sup>-1</sup> LiCl on a Waters gel permeation chromatography e2695 system embedded with a column (4.6 × 150 mm Tosoh TSKgel SuperMultiporeHZ-M). The  $M_n$  and  $D$  values of the polymers were calculated with polystyrene calibration. The standard IR spectra were recorded using an Agilent Cary 630 spectrometer equipped with an ATR unit.

### **Synthesis**

**Typical procedure for the acid-mediated ethanolysis of PSt-OCF<sub>2</sub>CONH-hex:** To a test tube was added PSt-OCF<sub>2</sub>CONH-*n*-hexyl (450 mg, 1.57 mmol, 1.0 eq.), PTSA (1.49 g, 7.84 mmol, 5.0 eq.), ethanol (4.5 mL), and 1,2-dichloroethane (0.9 mL) and allowed to react at 80 °C for 72 hours under open conditions. The target compound was obtained by reprecipitation into ethanol.

Yield: 312 mg (82.1 %), SEC; 61.2 kg·mol<sup>-1</sup>,  $D$ ; 1.58

**Kinetic measurements for post-polymerization modification reaction:** Under an open condition, PSt-OCF<sub>2</sub>CONH-hexyl (300 mg, 1.05 mmol, 1.0 eq.), PTSA (1.00 g, 5.23 mmol, 5.0 eq.), ethanol (3.0 mL) and 1,2-dichloroethane (0.6 mL) were added to a vial and allowed to react at 80 °C. An aliquot of

the reaction solution in the vial was collected after each predetermined reaction time and  $^{19}\text{F}$  NMR measurements were performed. The obtained data were analyzed by using MestRenova software.

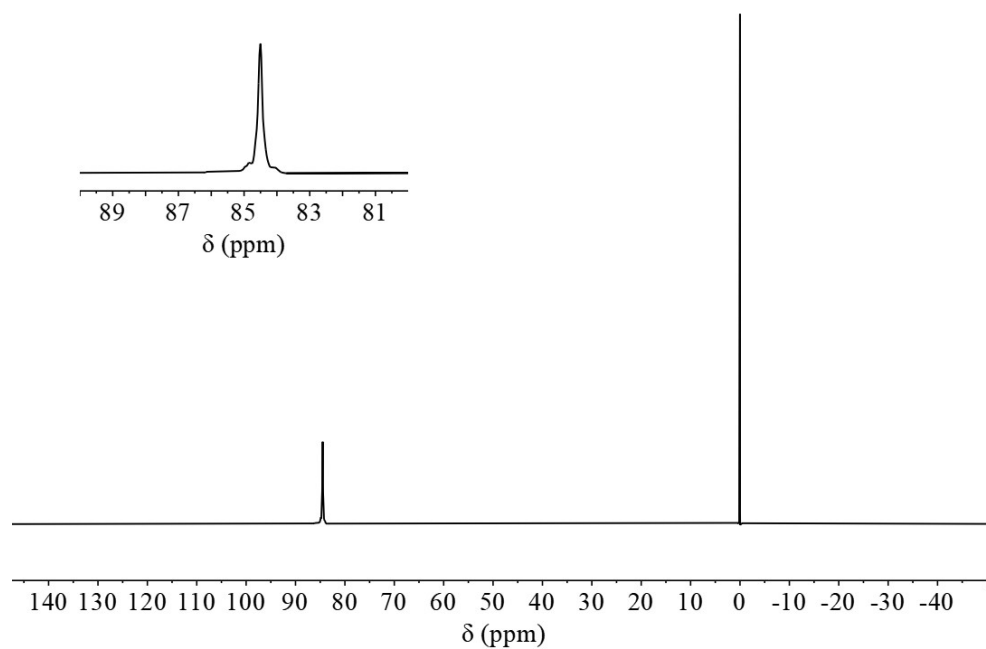

**Figure S-1.**  $^{19}\text{F}$  NMR spectrum in  $\text{CDCl}_3$  of the obtained polymer after acid-mediated ethanolysis of PSt-OCF<sub>2</sub>CONH-hex (run 1 in Table 1).

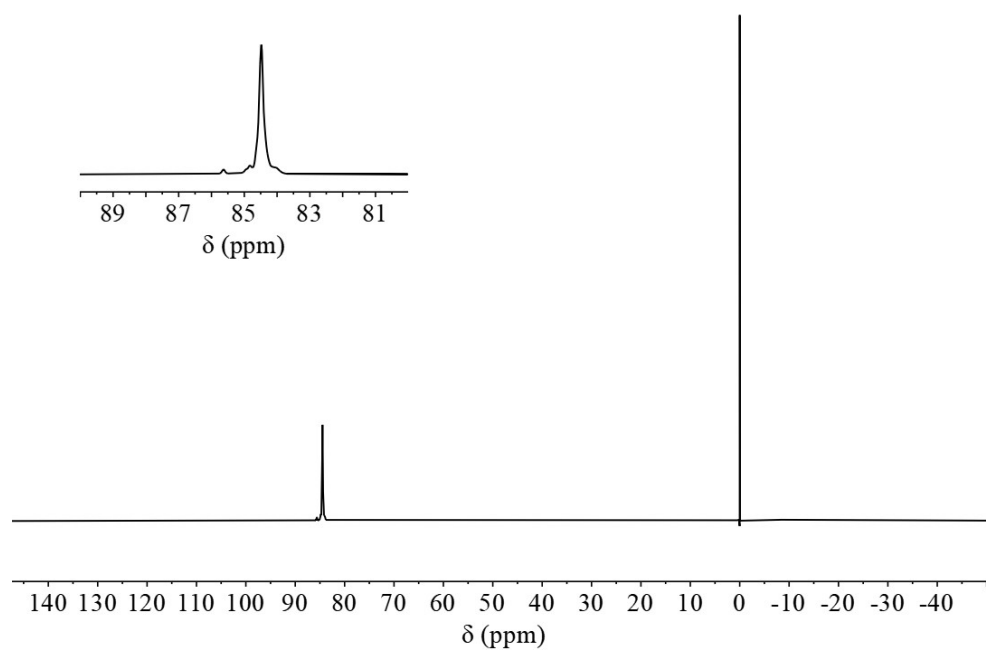

**Figure S-2.**  $^{19}\text{F}$  NMR spectrum in  $\text{CDCl}_3$  of the obtained polymer after acid-mediated ethanolysis of PSt-OCF<sub>2</sub>CONH-hex (run 2 in Table 1).

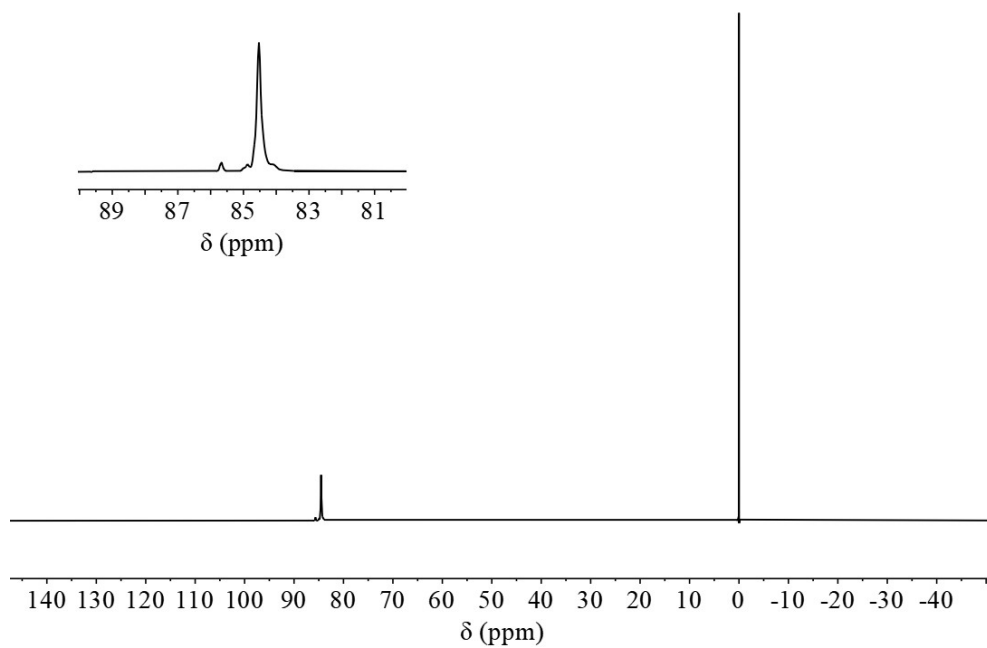

**Figure S-3.**  $^{19}\text{F}$  NMR spectrum in  $\text{CDCl}_3$  of the obtained polymer after acid-mediated ethanolysis of PSt- $\text{OCF}_2\text{CONH}$ -hex (run 3 in Table 1).

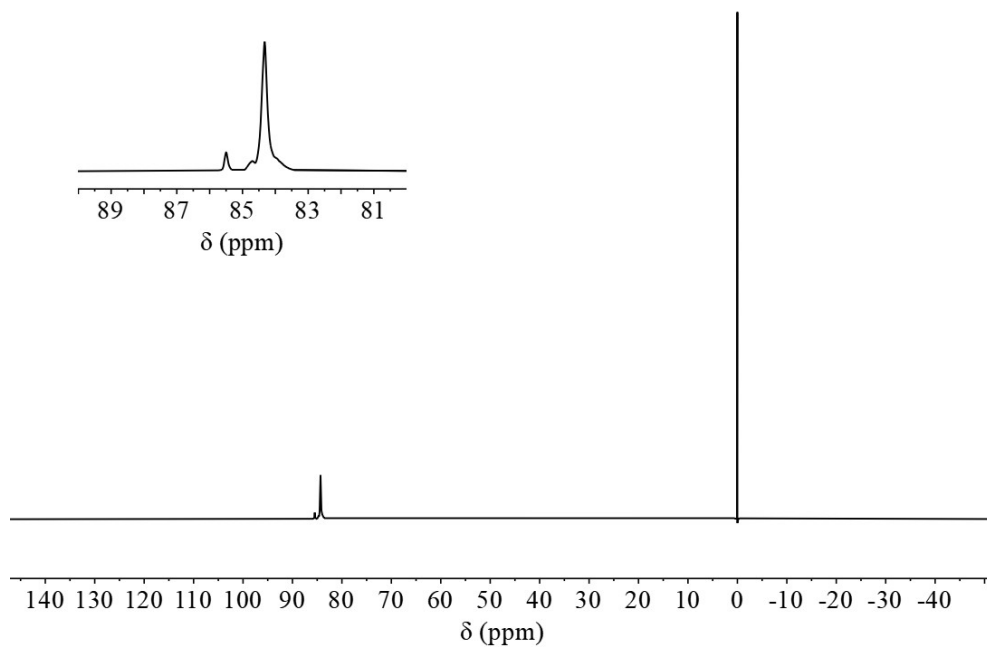

**Figure S-4.**  $^{19}\text{F}$  NMR spectrum in  $\text{CDCl}_3$  of the obtained polymer after acid-mediated ethanolysis of PSt- $\text{OCF}_2\text{CONH}$ -hex (run 4 in Table 1).

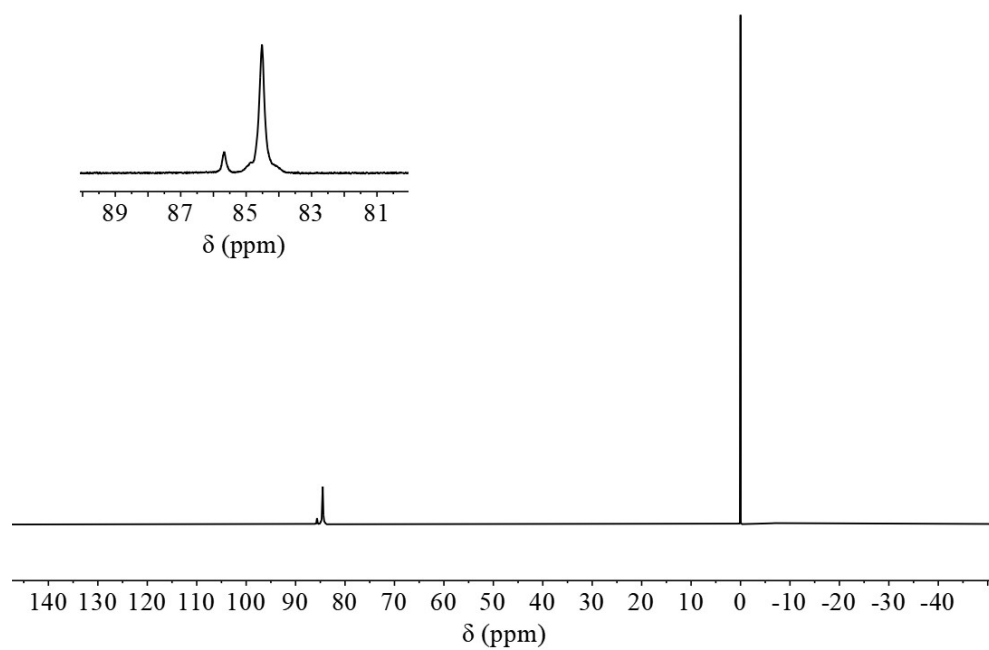

**Figure S-5.**  $^{19}\text{F}$  NMR spectrum in  $\text{CDCl}_3$  of the obtained polymer after acid-mediated ethanolysis of PSt-OCF<sub>2</sub>CONH-hex (run 5 in Table 1).

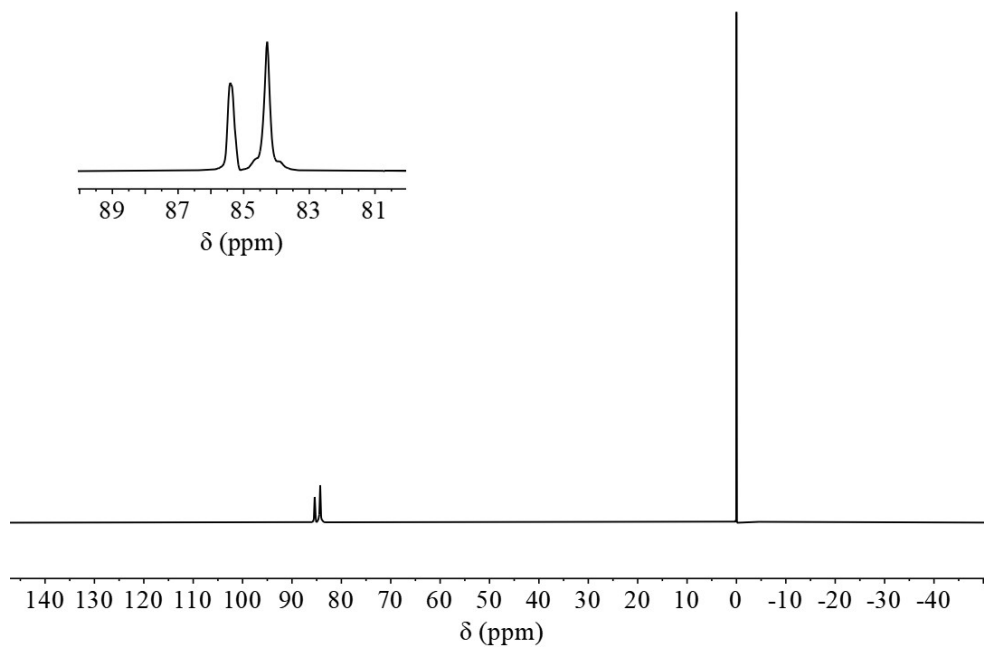

**Figure S-6.**  $^{19}\text{F}$  NMR spectrum in  $\text{CDCl}_3$  of the obtained polymer after acid-mediated ethanolysis of PSt-OCF<sub>2</sub>CONH-hex (run 6 in Table 1).

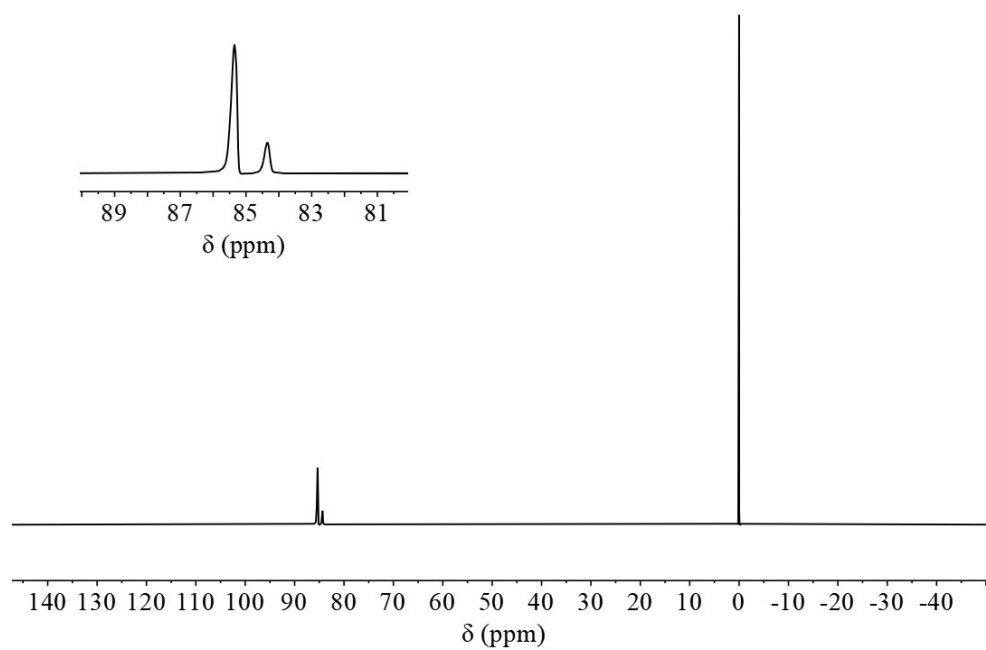

**Figure S-7.**  $^{19}\text{F}$  NMR spectrum in  $\text{CDCl}_3$  of the obtained polymer after acid-mediated ethanolysis of PSt- $\text{OCF}_2\text{CONH}$ -hex (run 7 in Table 1).

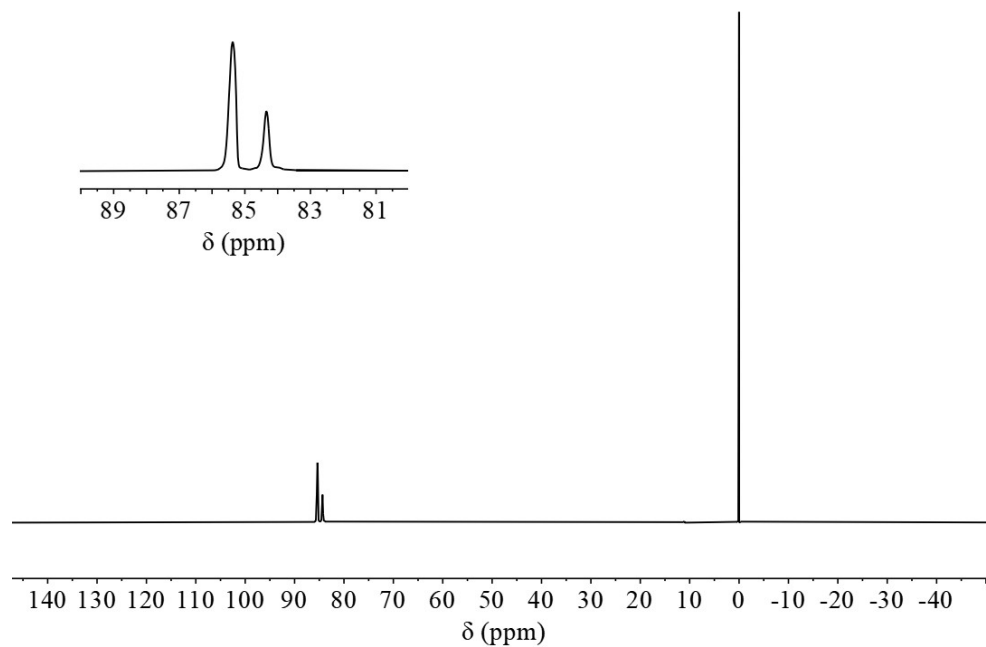

**Figure S-8.**  $^{19}\text{F}$  NMR spectrum in  $\text{CDCl}_3$  of the obtained polymer after acid-mediated ethanolysis of PSt- $\text{OCF}_2\text{CONH}$ -hex (run 8 in Table 1).

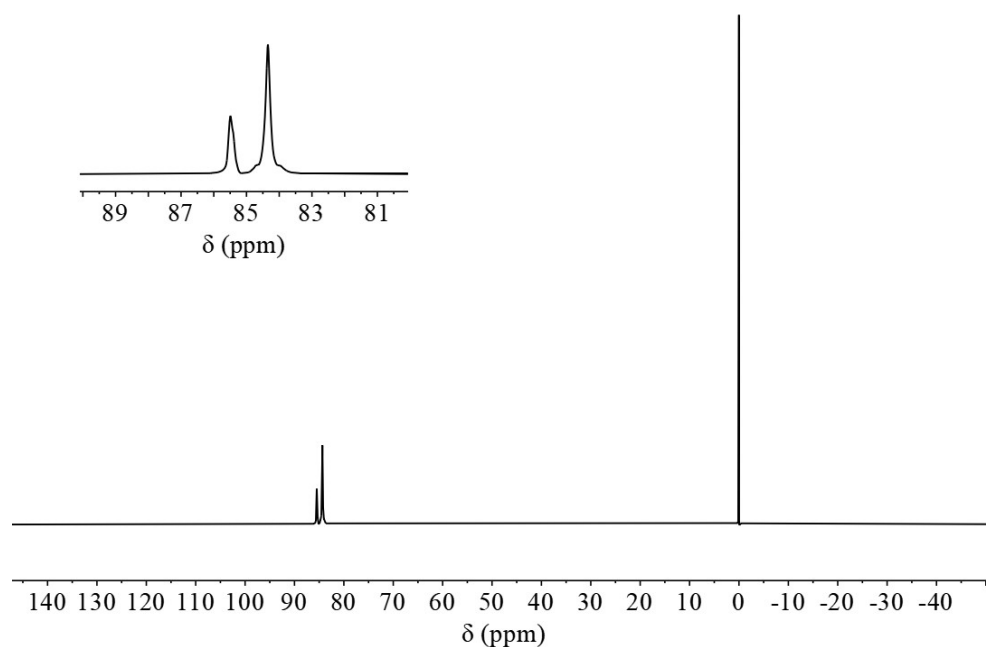

**Figure S-9.**  $^{19}\text{F}$  NMR spectrum in  $\text{CDCl}_3$  of the obtained polymer after acid-mediated ethanolysis of PSt- $\text{OCF}_2\text{CONH}$ -hex (run 9 in Table 1).

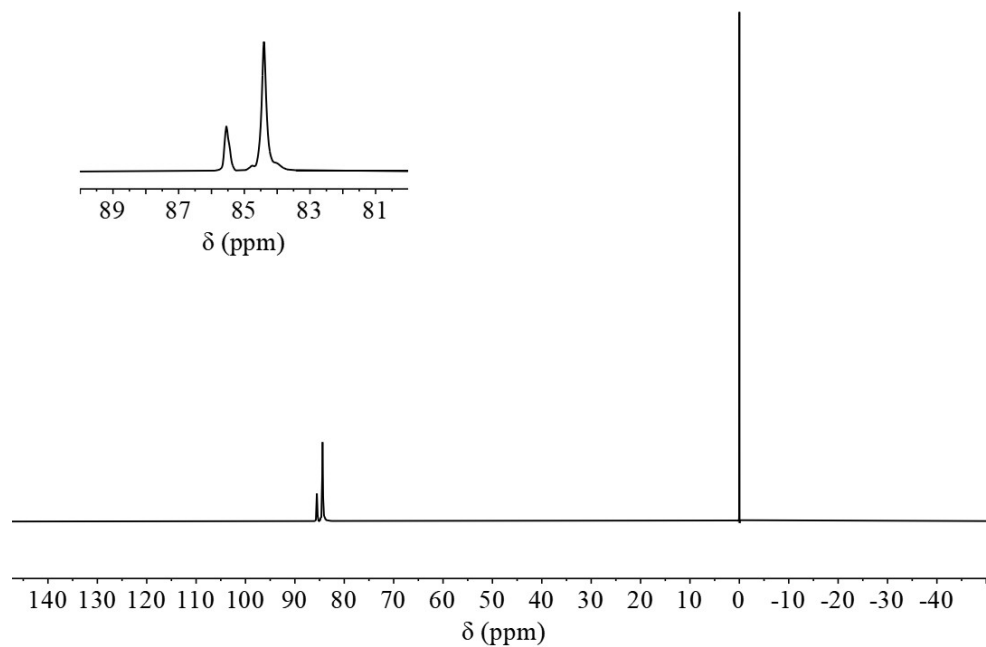

**Figure S-10.**  $^{19}\text{F}$  NMR spectrum in  $\text{CDCl}_3$  of the obtained polymer after acid-mediated ethanolysis of PSt- $\text{OCF}_2\text{CONH}$ -hex (run 10 in Table 1).

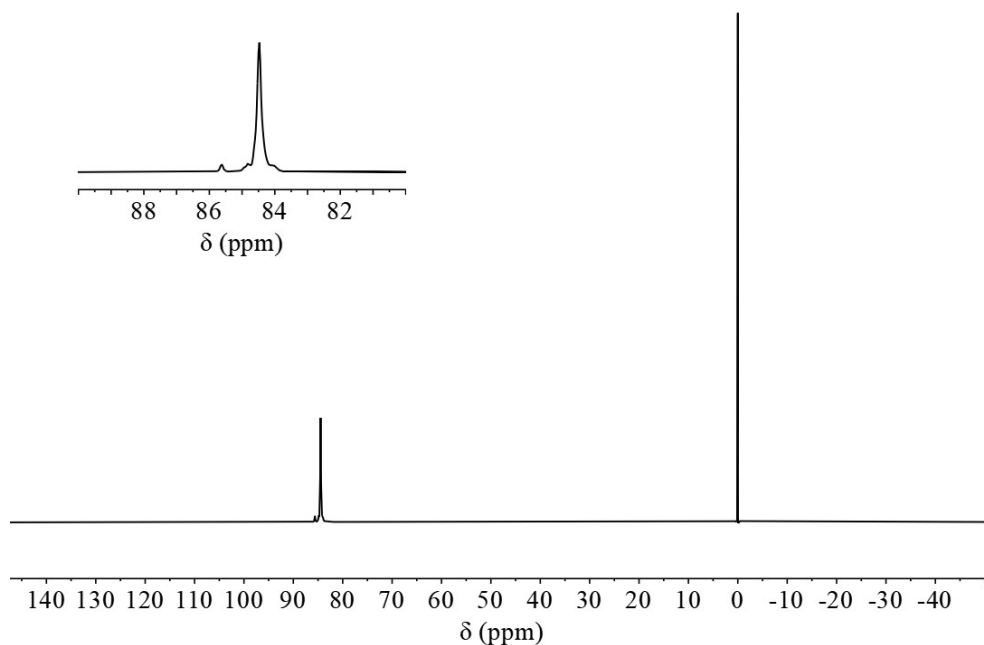

**Figure S-11.**  $^{19}\text{F}$  NMR spectrum in  $\text{CDCl}_3$  of the obtained polymer after acid-mediated ethanolysis of PSt-OCF<sub>2</sub>CONH-hex (run 11 in Table 1).

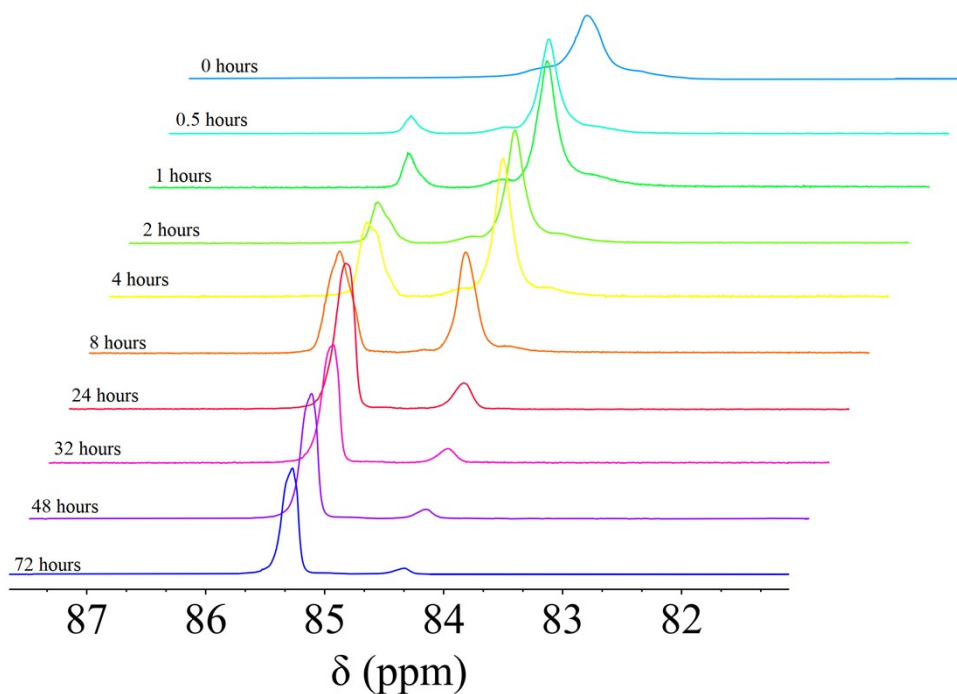

**Figure S-12.** Waterfall  $^{19}\text{F}$  NMR spectra in  $\text{CDCl}_3$  of the kinetic analysis for acid-mediated ethanolysis of PSt-OCF<sub>2</sub>CONH-hex (Figure 1).



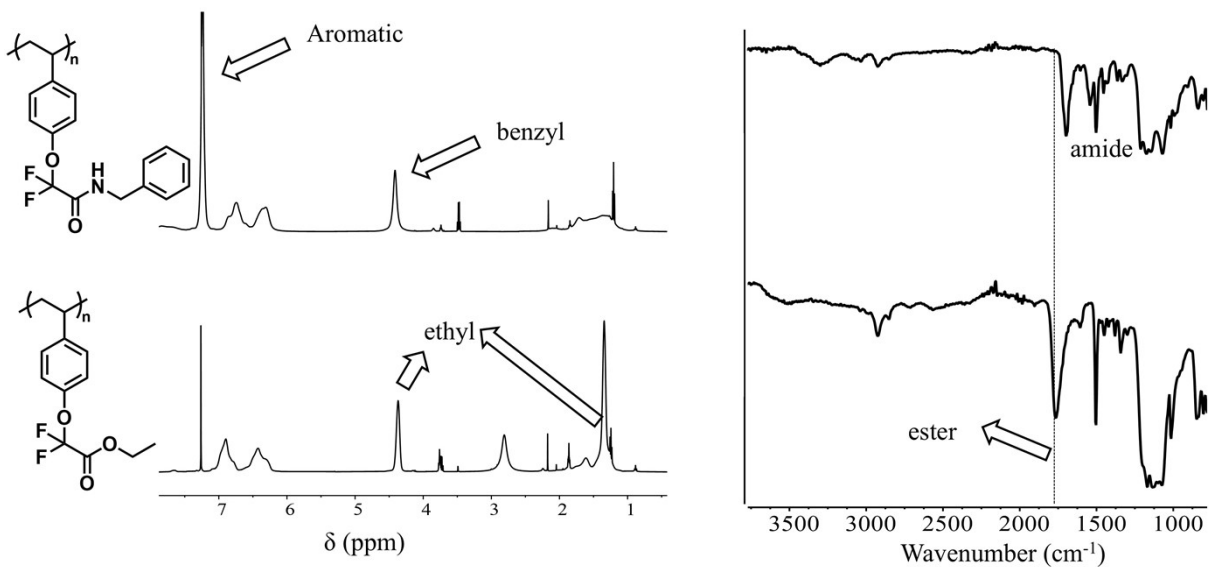

**Figure S-13.** <sup>1</sup>H NMR in CDCl<sub>3</sub> and ATR-mode FT-IR spectra of the polymers before and after the acid-mediated ethanolysis of the polymeric amides derived from benzylamine.

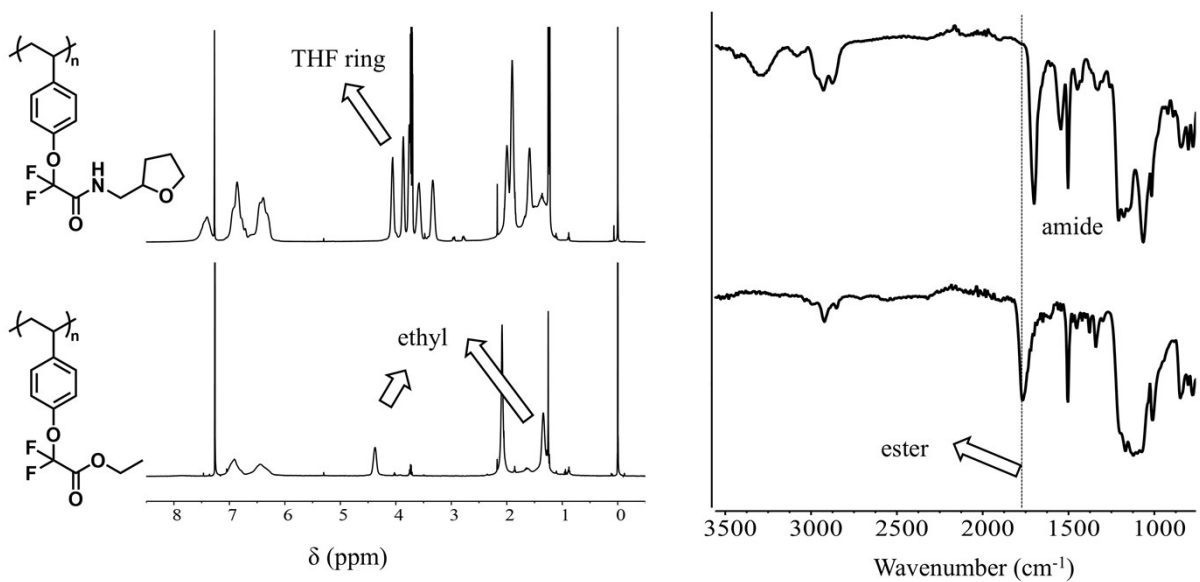

**Figure S-14.** <sup>1</sup>H NMR in CDCl<sub>3</sub> and ATR-mode FT-IR spectra of the polymers before and after the acid-mediated ethanolysis of the polymeric amides derived from tetrahydrofurfurylamine.

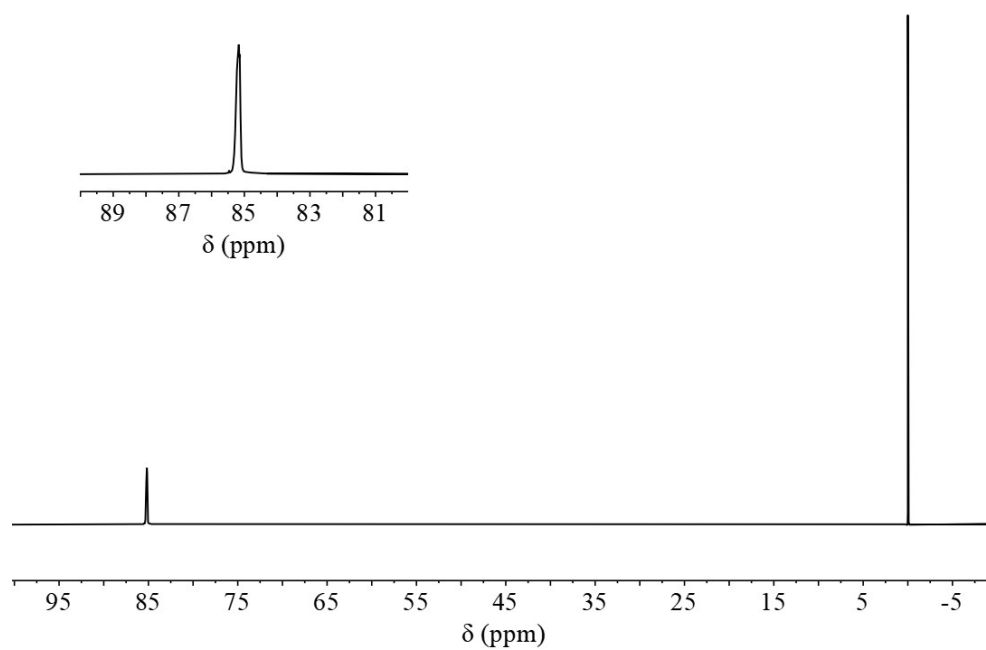

**Figure S-15.**  $^{19}\text{F}$  NMR spectrum in  $\text{CDCl}_3$  of the obtained polymer via the sequential PPM at the stage of A depicted in Figure 3.

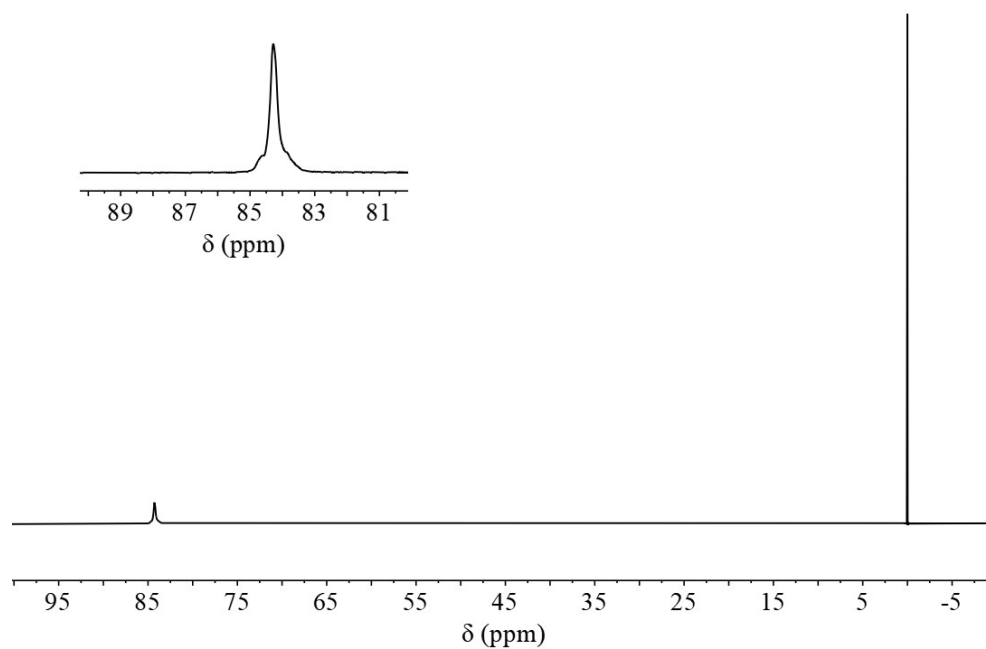

**Figure S-16.**  $^{19}\text{F}$  NMR spectrum in  $\text{CDCl}_3$  of the obtained polymer via the sequential PPM at the stage of B depicted in Figure 3.

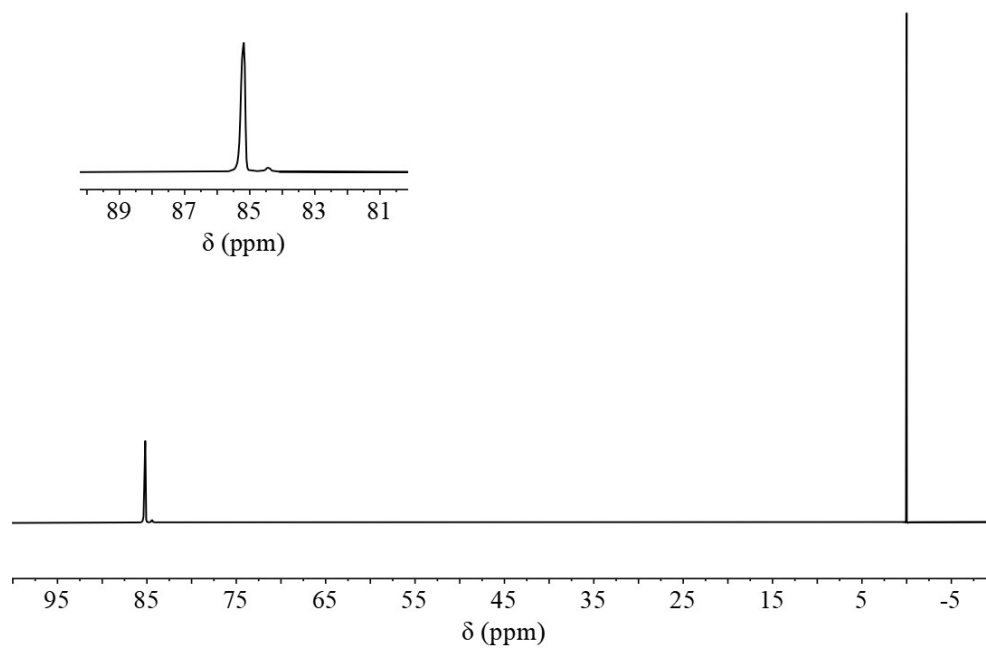

**Figure S-17.**  $^{19}\text{F}$  NMR spectrum in  $\text{CDCl}_3$  of the obtained polymer via the sequential PPM at the stage of C depicted in Figure 3.

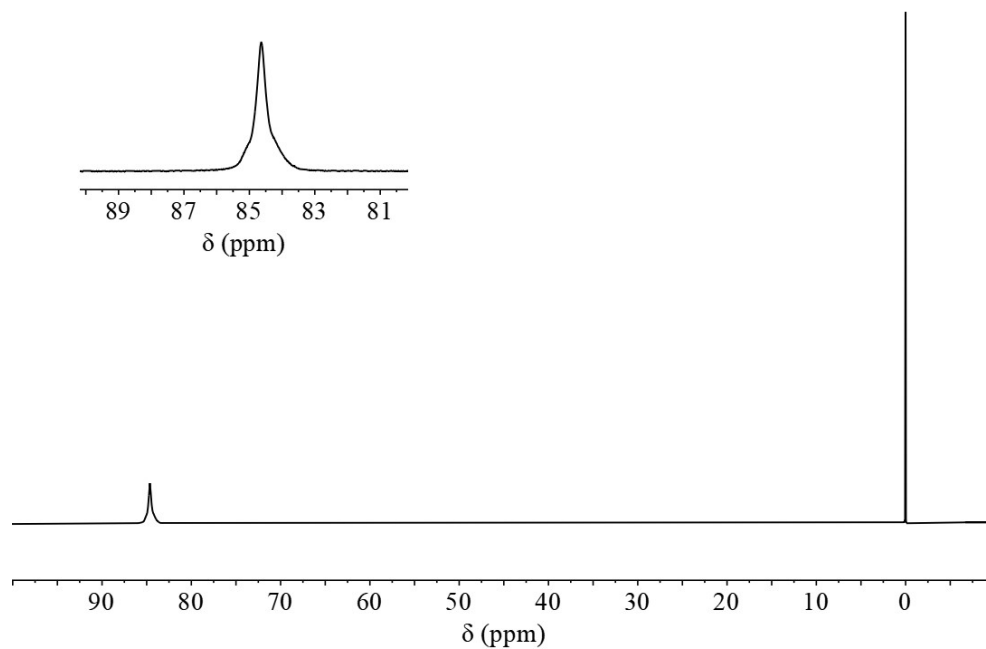

**Figure S-18.**  $^{19}\text{F}$  NMR spectrum in  $\text{CDCl}_3$  of the obtained polymer via the sequential PPM at the stage of D depicted in Figure 3.

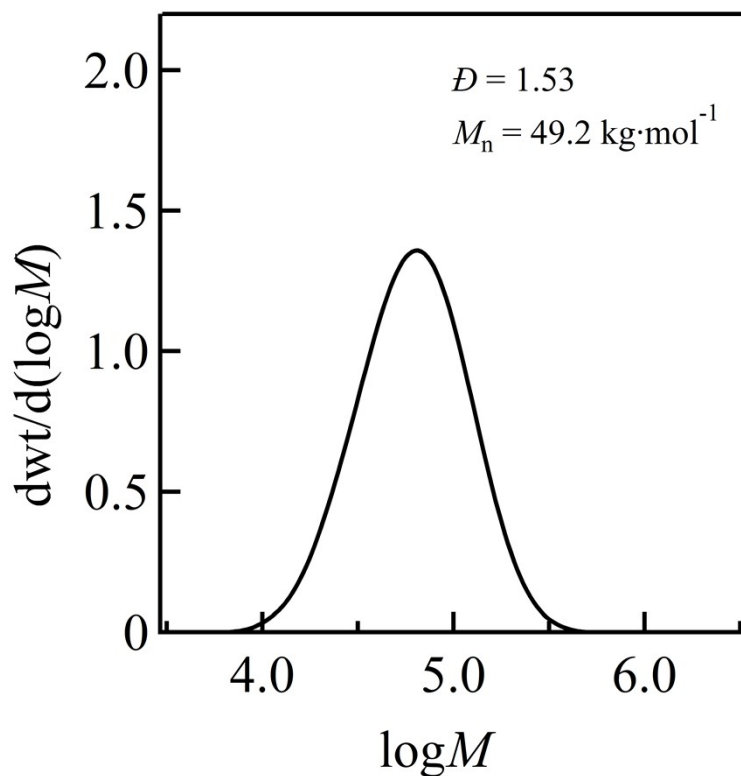

**Figure S-19.** SEC trace of the obtained polymer via the sequential PPM at the stage of A depicted in Figure 3.

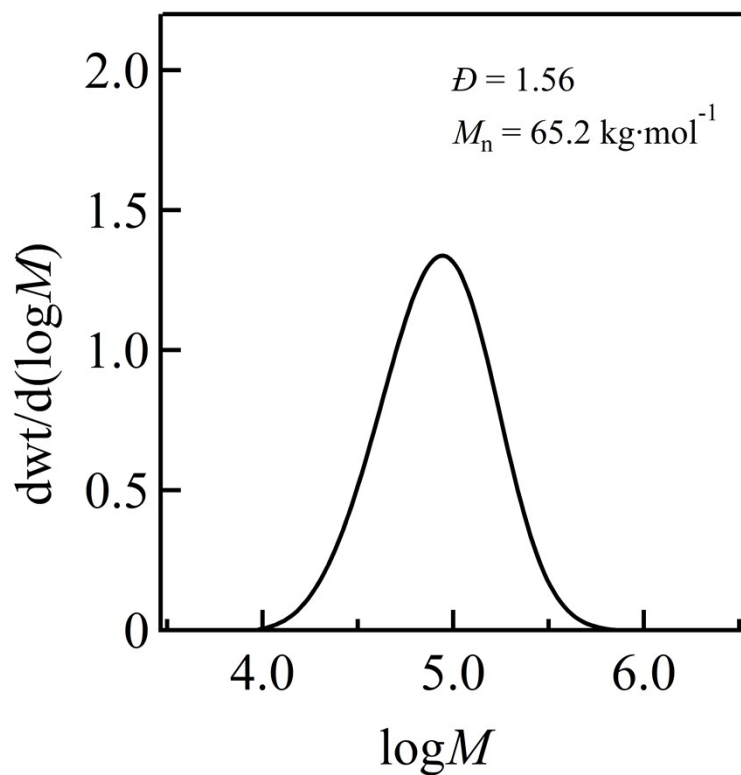

**Figure S-20.** SEC trace of the obtained polymer via the sequential PPM at the stage of B depicted in Figure 3.

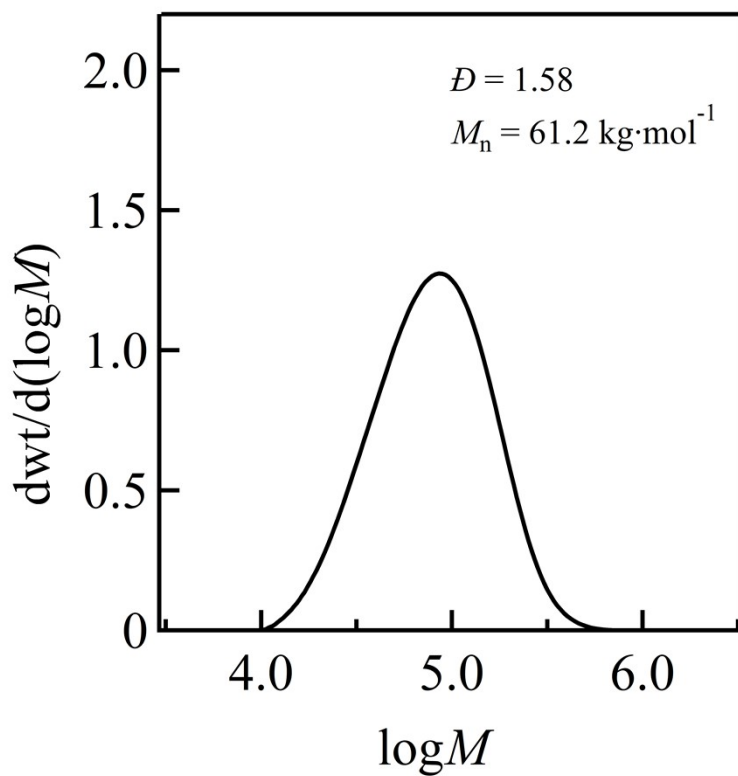

**Figure S-21.** SEC trace of the obtained polymer via the sequential PPM at the stage of C depicted in Figure 3.

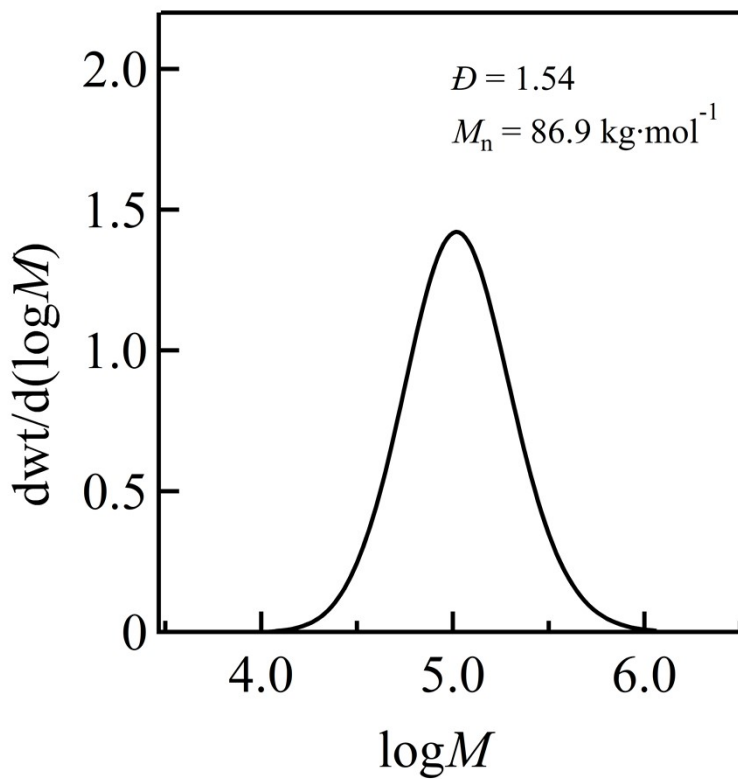

**Figure S-22.** SEC trace of the obtained polymer via the sequential PPM at the stage of D depicted in Figure 3.

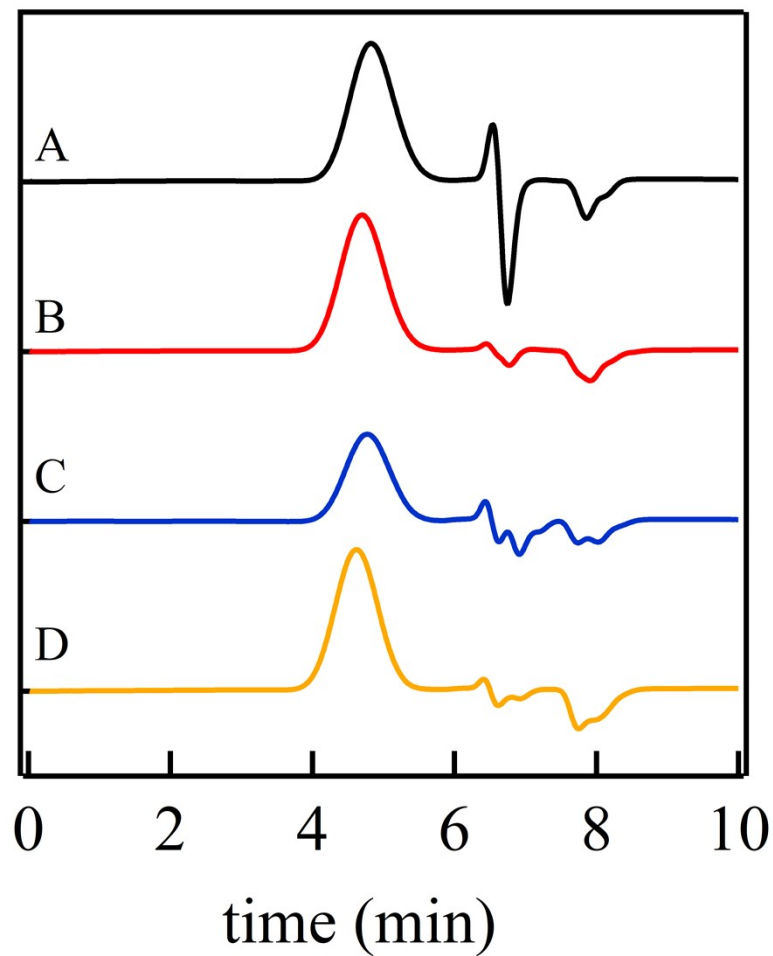

**Figure S-23.** Original SEC charts of the obtained polymers (A,B,C, and D) via the sequential PPMs depicted in Figure 3.

#### References

1. R. Kakuchi, K. Matsubara, K. Fukasawa and H. Amii, *Macromolecules*, 2021, **54**, 6204-6213.
